# Supplementary material for: High-Value Utilization of Silicon Cutting Waste and Excrementum Bombycis to Synthesize Silicon–Carbon Composites as Anode Materials for Li-Ion Batteries
Source: MDPI journal article supplement (doi:10.3390/nano12162875), 2022-08-21
Supplement: s1 [file s1]

## Supplementary Materials

For

# High-Value Utilization of Silicon Cutting Waste and Excrementum Bombycis to Synthesize Silicon–Carbon Composites as Anode Materials for Li-Ion Batteries

Hengsong Ji <sup>1,†</sup>, Jun Li <sup>1,†</sup>, Sheng Li <sup>1</sup>, Yingxue Cui <sup>1,\*</sup>, Zhijin Liu <sup>1</sup>, Minggang Huang <sup>2</sup>, Chun Xu <sup>2</sup>, Guochun Li <sup>1</sup>, Yan Zhao <sup>3</sup> and Huaming Li <sup>1</sup>

<sup>1</sup> Institute for Energy Research, Jiangsu University, Zhenjiang 212013, China;

<sup>2</sup> Key Laboratory of Fine Chemical Application Technology of Luzhou, Luzhou 646099, China

<sup>3</sup> College of Chemistry and Chemical Engineering, Inner Mongolia University, Hohhot 010021, China

\* Correspondence: [yxcui@ujs.edu.cn](mailto:yxcui@ujs.edu.cn) (Y.C.)

† These authors contributed equally to this work.

## Supplementary Figures:

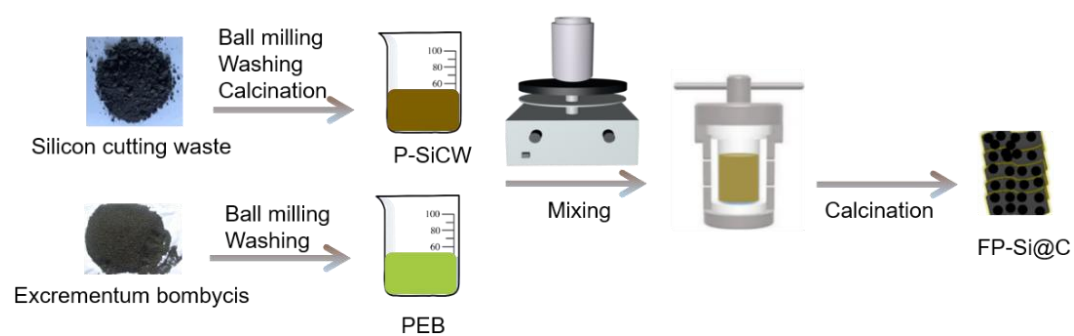

**Figure S1.** Schematic illustration of the synthesis process for FP-Si@C composites.

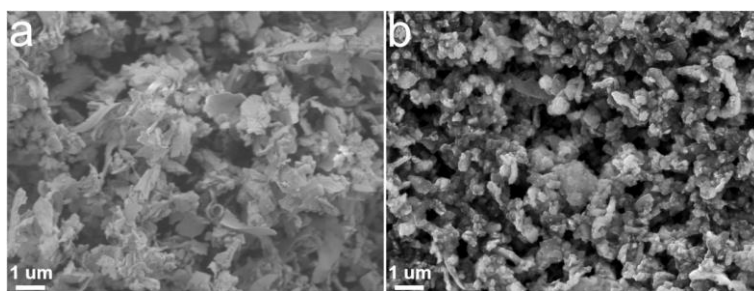

**Figure S2.** SEM images of (a) silicon cutting waste scragglomerations and (b) P-SiCW.

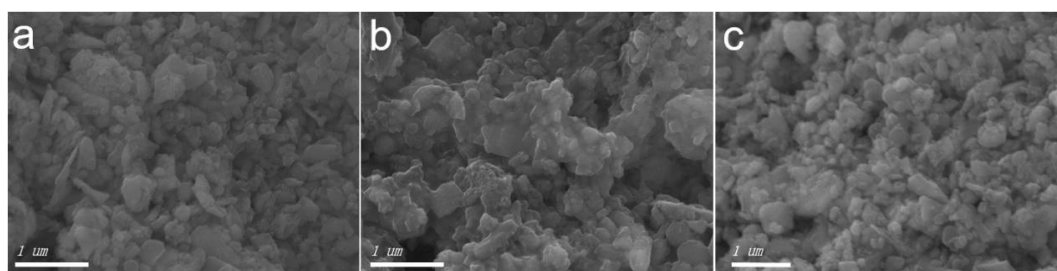

**Figure S3.** SEM images of (a) FP-Si@C-1, (b) FP-Si@C-2, and (c) FP-Si@C-3.

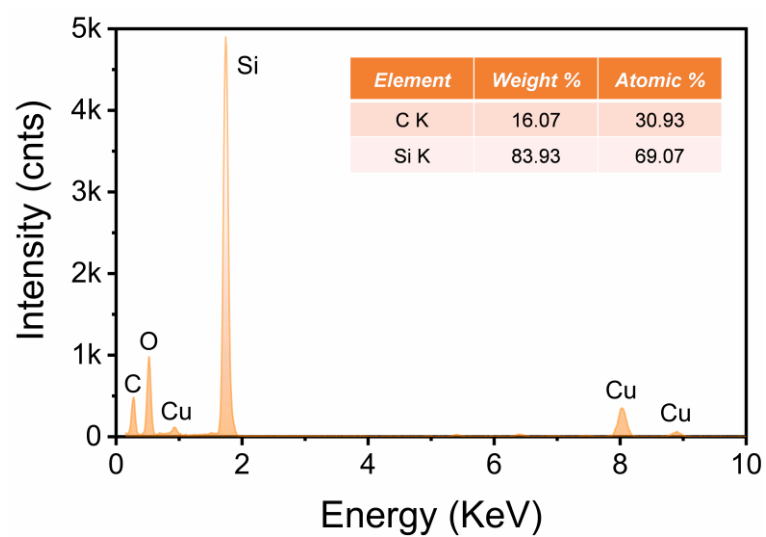

**Figure S4.** EDS spectrum of FP-Si@C-2 (Inset is the weight and atomic content of C and Si).

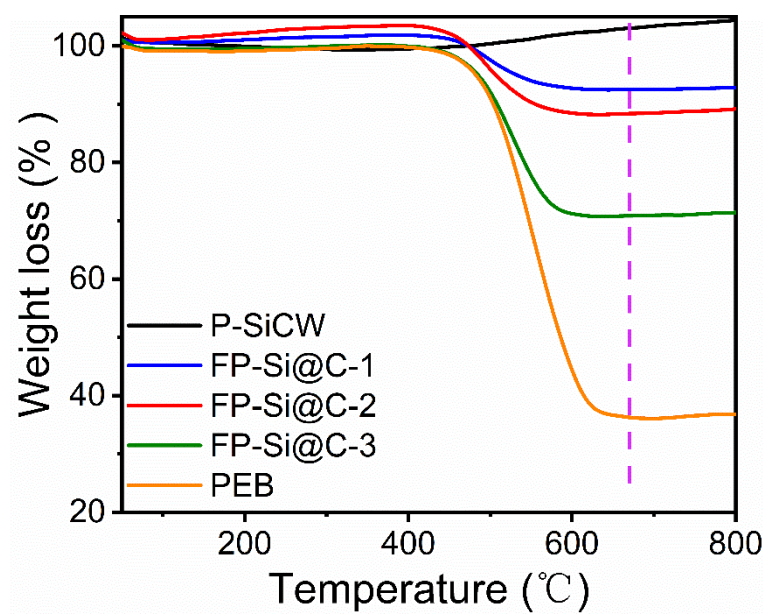

**Figure S5.** TGA curves of P-SiCW, PEB, FP-Si@C-1, FP-Si@C-2, and FP-Si@C-3.

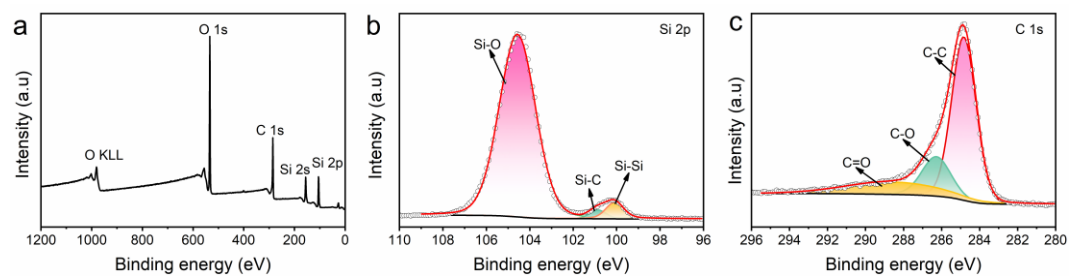

**Figure S6.** (a) XPS full spectrum, (b) XPS Si 2p spectrum, and (c) XPS C 1s spectrum of FP-Si@C-2.

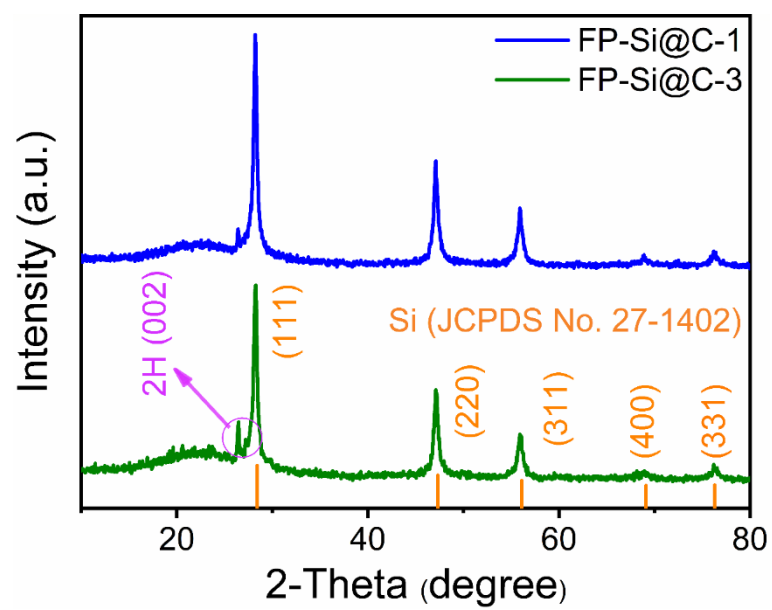

**Figure S7.** XRD patterns of FP-Si@C-1 and FP-Si@C-3.



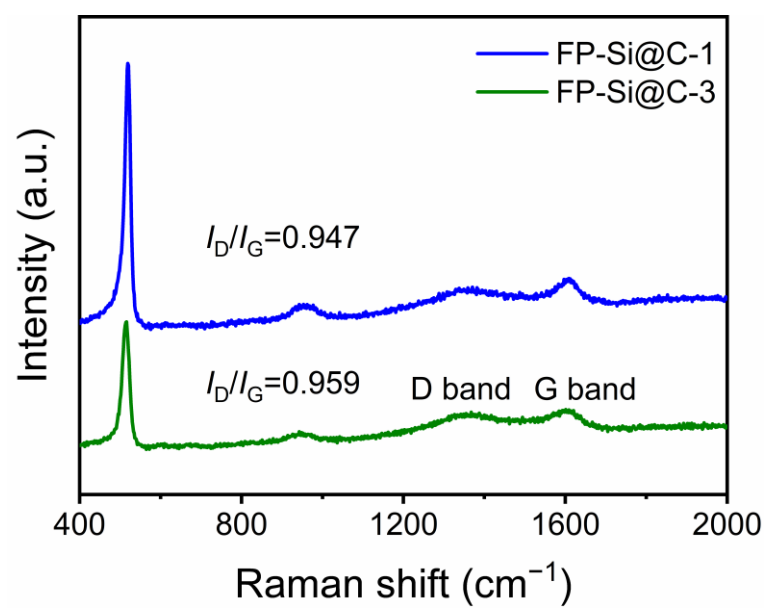

**Figure S8.** Raman spectra of FP-Si@C-1 and FP-Si@C-3.

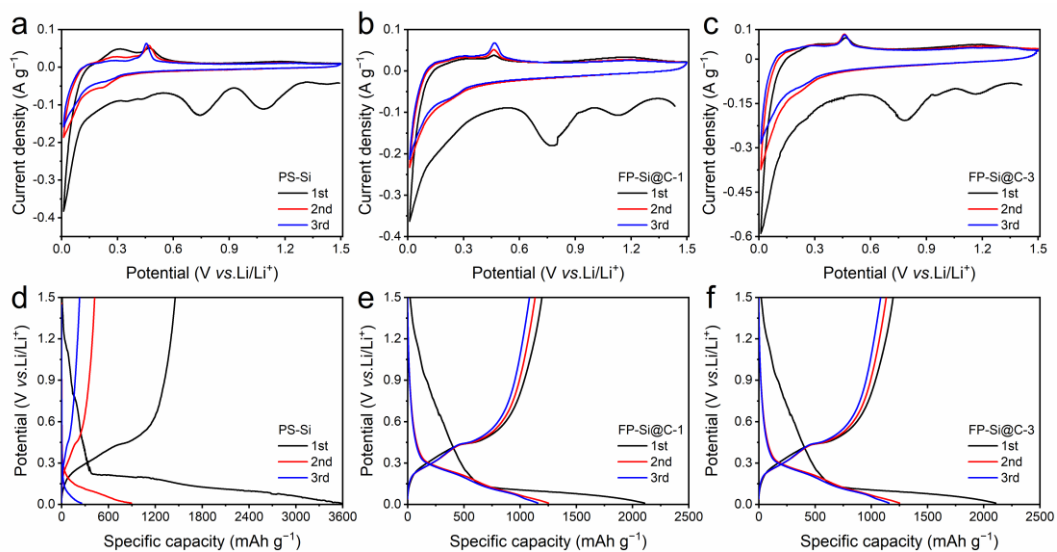

**Figure S9.** (a-c) The initial three CV curves of P-SiCW, FP-Si@C-1, and FP-Si@C-3 at 0.1 mV s<sup>-1</sup>. (d-f) The initial three GCD curves of P-SiCW, FP-Si@C-1, and FP-Si@C-3 at 0.1 A g<sup>-1</sup>.

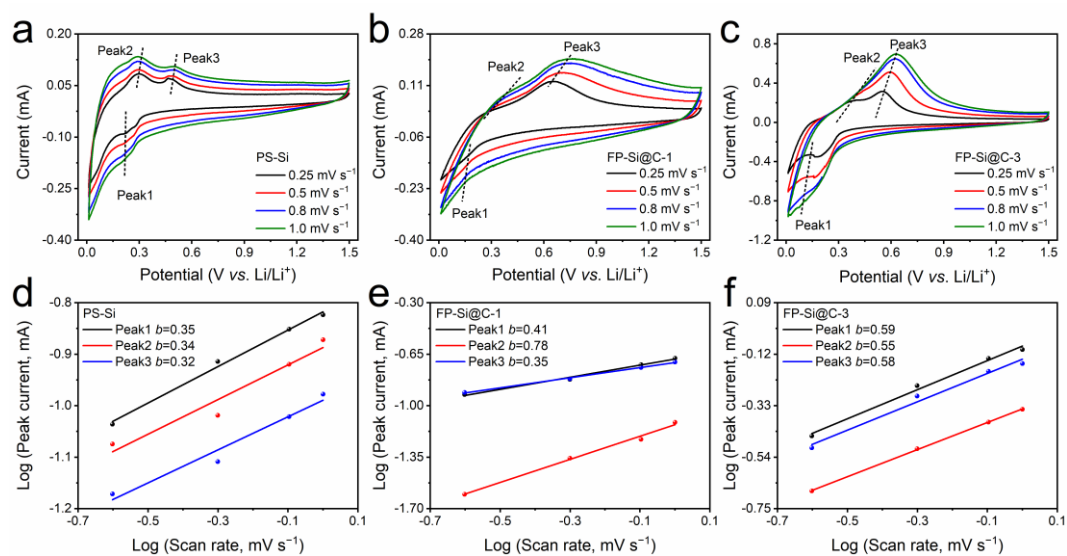

**Figure S10.** (a–c) The CV curves of P-SiCW, FP-Si@C-1, and FP-Si@C-3 at different scan rates. (d–f) The log(*i*)-log(*v*) plots of P-SiCW, FP-Si@C-1, and FP-Si@C-3.

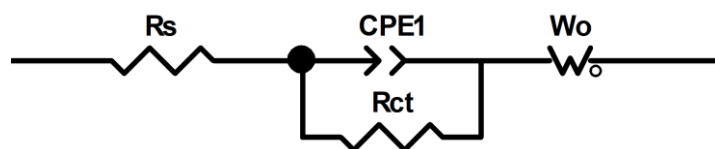

**Figure S11.** Equivalent circuit model linked with EIS curves.

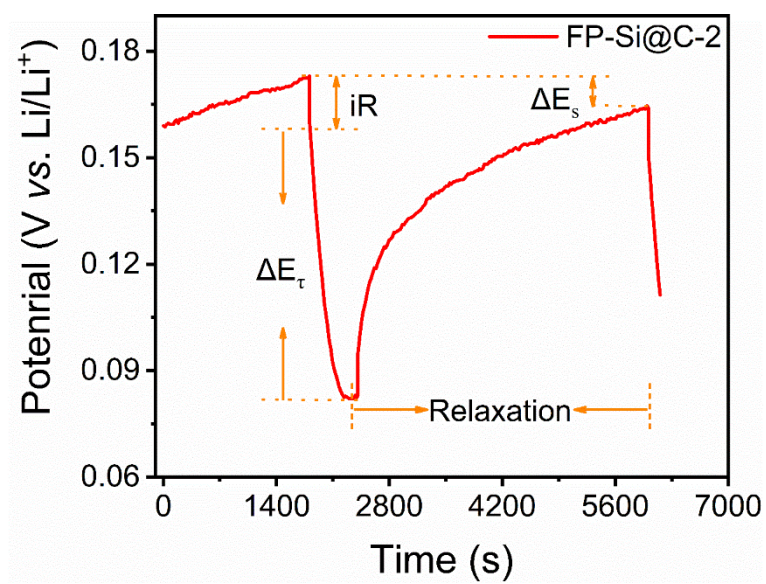

**Figure S12.** Partial enlarged view about GITT results and marked  $\Delta E_s$  and  $\Delta E_{\tau}$  of FP-Si@C-2.

Supplementary Tables:

Table S1. XRF results of silicon cutting waste and P-SiCW.

| Sample EA             | Si    | Fe     | Cr     | Ni     | Cu     | Cl     | Mg     | Mo     |
|-----------------------|-------|--------|--------|--------|--------|--------|--------|--------|
| Weight (%)            |       |        |        |        |        |        |        |        |
| Silicon cutting waste | 83.84 | 10.34  | 3.44   | 1.8    | 0.134  | 0.0637 | 0.0382 | 0.037  |
| P-SiCW                | 99.83 | 0.0067 | 0.0007 | 0.0256 | 0.0005 | 0.0027 | 0.0336 | 0.0043 |

**Table S2.** BET specific surface area, pore volume, and BJH pore size of P-SiCW and FP-Si@C-2.

| <b>Sample</b> | <b><math>S_{\text{BET}}</math> (<math>\text{m}^2 \text{g}^{-1}</math>)</b> | <b><math>V_{\text{total}}</math> (<math>\text{cm}^3 \text{g}^{-1}</math>)</b> | <b>Average pore size (BJH) (nm)</b> |
|---------------|----------------------------------------------------------------------------|-------------------------------------------------------------------------------|-------------------------------------|
| P-SiCW        | 113.50                                                                     | 0.24                                                                          | 8.31                                |
| FP-Si@C-2     | 61.76                                                                      | 0.14                                                                          | 9.32                                |

**Table S3.** The  $R_{ct}$  and Warburg values of P-SiCW, FP-Si@C-1, FP-Si@C-2 and FP-Si@C-3.

| Sample    | $R_{ct}$ (ohm) | $\sigma$ ( $\Omega$ S <sup>-1/2</sup> ) |
|-----------|----------------|-----------------------------------------|
| P-SiCW    | 97.8           | 46.9                                    |
| FP-Si@C-1 | 102.8          | 27.2                                    |
| FP-Si@C-2 | 91.5           | 25.9                                    |
| FP-Si@C-3 | 116.5          | 40.2                                    |
